# Supplementary material for: Modeling Future Climate Impacts on Brazil’s Operational Wind and Solar Energy Capacity
Source: Research Square preprint supplement (doi:10.21203/rs.3.rs-8065972/v1), 2025-12-01
Supplement: Supplementary file 1 [file aecc53c16df09eeffa30a664.docx]

**MODELING FUTURE CLIMATE IMPACTS ON BRAZIL’S OPERATIONAL WIND AND SOLAR ENERGY CAPACITY**

Felipe Husadel Poyera*, Francisco Lopes Limaa, Rodrigo Santos Costaa, André Rodrigues Gonçalvesa, Fernando R. Martinsb, André F. Lucenac, Enio Bueno Pereiraa

*aLaboratory for Modeling and Studies of Renewable Energy Resources -* [*http://labren.ccst.inpe.br/,*](http://labren.ccst.inpe.br/) *National Institute for Space Research (INPE), Av.*

*Astronautas, 1758, São José dos Campos, 12227010, São Paulo, Brazil*

b*Institute of Marine Science (IMar), Federal University of São Paulo (UNIFESP): Rua Carvalho de Mendonça, 144, CEP: 11030-100, Santos, São Paulo, Brazil.*

*cCenter for Energy and Environmental Economics (Cenergia), Energy Planning Program (PPE), Coppe, Federal University of Rio de Janeiro, Centro Tecnológico, Sala C-211, C.P. 68565, Cidade Universitária, Ilha do Fundão, 21941-972, Rio de Janeiro, Brazil*

** Corresponding author:* [*felipe.poyer@inpe.br*](mailto:felipe.poyer@inpe.br)

# Supplementary Material

*1 – Results: Regions of analysis*

Table 1 presents the number of power plants, municipalities, and total installed capacity for wind and solar PV energy resources as of the end of 2024.

**Table 1** – Region of analysis

| **Source** | **n° of Power Plants** | **N° of municipalities** | **Installed Capacity** |
| --- | --- | --- | --- |
| **Wind** | 1023 | 116 | 31.778 MW |
| **PV Solar** | 439 | 48 | 16.536 MW |

*Source: Based on wind and PV power plant databases [40; 41]*

*2- Results: Clustering* *Analyses*

As explained in *Sections 3.2* of the main article, the clustering information is presented in Table 2 and Table 3, and the complete list of wind and solar municipalities and their respective clusters is presented in Tables 4 and Table 5.

**Table 2** – Wind Clusters

| **Cluster** | **n° of Power Plants** | **N° of municipalities** | **Installed Capacity** |
| --- | --- | --- | --- |
| **NE** | 459 | 64 | 14.364 MW |
| **BA_PI** | 477 | 43 | 15.212 MW |
| **S** | 87 | 9 | 2.201 MW |

**Table 3** – Solar Clusters

| **Cluster** | **n° of Power Plants** | **N° of municipalities** | **Installed Capacity** |
| --- | --- | --- | --- |
| **NE** | 187 | 27 | 6.520 MW |
| **BA_MG** | 218 | 13 | 8.848 MW |
| **SP** | 34 | 8 | 1.167 MW |

**Table 4** – Wind municipalities and clusters

|  | **State** | **Municipality** | **Cluster** |  | **State** | **Municipality** | **Cluster** |  | **State** | **Municipality** | **Cluster** |
| --- | --- | --- | --- | --- | --- | --- | --- | --- | --- | --- | --- |
| 1 | CE | Acaraú | NE | 40 | BA | Gentio do Ouro | BA_PI | 79 | PI | Queimada Nova | BA_PI |
| 2 | RN | Afonso Bezerra | NE | 41 | RN | Guamaré | NE | 80 | BA | Riacho de Santana | BA_PI |
| 3 | SC | Água Doce | S | 42 | BA | Guanambi | BA_PI | 81 | RN | Riachuelo | NE |
| 4 | CE | Amontada | NE | 43 | CE | Ibiapina | NE | 82 | RS | Rio Grande | S |
| 5 | RN | Angicos | NE | 44 | BA | Ibipeba | BA_PI | 83 | RN | Ruy Barbosa | NE |
| 6 | CE | Aracati | NE | 45 | BA | Ibitiara | BA_PI | 84 | PE | Saloá | NE |
| 7 | BA | Araci | NE | 46 | CE | Icapuí | NE | 85 | PB | Santa Luzia | NE |
| 8 | PE | Araripina | BA_PI | 47 | BA | Igaporã | BA_PI | 86 | RS | Santa Vitória do Palmar | S |
| 9 | RN | Areia Branca | NE | 48 | BA | Iraquara | BA_PI | 87 | RS | Santana do Livramento | S |
| 10 | PB | Areia de Baraúnas | NE | 49 | BA | Itaguaçu da Bahia | BA_PI | 88 | RN | Santana do Matos | NE |
| 11 | MA | Barreirinhas | NE | 50 | CE | Itarema | NE | 89 | RN | São Bento do Norte | NE |
| 12 | RN | Bento Fernandes | NE | 51 | RN | Jandaíra | NE | 90 | CE | São Gonçalo do Amarante | NE |
| 13 | PI | Betânia do Piauí | BA_PI | 52 | RN | Jardim de Angicos | NE | 91 | RN | São José do Campestre | NE |
| 14 | BA | Biritinga | NE | 53 | RN | João Câmara | NE | 92 | PB | São José do Sabugi | NE |
| 15 | RN | Bodó | NE | 54 | PB | Junco do Seridó | NE | 93 | PB | São Mamede | NE |
| 16 | SC | Bom Jardim da Serra | S | 55 | PI | Lagoa do Barro do Piauí | BA_PI | 94 | RN | São Miguel do Gostoso | NE |
| 17 | BA | Boninal | BA_PI | 56 | RN | Lagoa Nova | NE | 95 | RN | São Tomé | NE |
| 18 | BA | Bonito | BA_PI | 57 | RN | Lajes | NE | 96 | RN | São Vicente | NE |
| 19 | BA | Brotas de Macaúbas | BA_PI | 58 | BA | Licínio de Almeida | BA_PI | 97 | BA | Sento Sé | BA_PI |
| 20 | BA | Brumado | BA_PI | 59 | RN | Macau | NE | 98 | RN | Serra de São Bento | NE |
| 21 | PE | Caetés | NE | 60 | PI | Marcolândia | BA_PI | 99 | RN | Serra do Mel | NE |
| 22 | BA | Caetité | BA_PI | 61 | RN | Monte das Gameleiras | NE | 100 | PI | Simões | BA_PI |
| 23 | BA | Cafarnaum | BA_PI | 62 | BA | Morro do Chapéu | BA_PI | 101 | BA | Souto Soares | BA_PI |
| 24 | RN | Caiçara do Norte | NE | 63 | BA | Mulungu do Morro | BA_PI | 102 | PE | Tacaratu | NE |
| 25 | RN | Caiçara do Rio do Vento | NE | 64 | BA | Novo Horizonte | BA_PI | 103 | BA | Tanque Novo | BA_PI |
| 26 | PI | Caldeirão Grande do Piauí | BA_PI | 65 | RS | Osório | S | 104 | RN | Tenente Laurentino Cruz | NE |
| 27 | BA | Campo Formoso | BA_PI | 66 | PE | Ouricuri | BA_PI | 105 | CE | Tianguá | NE |
| 28 | BA | Canudos | BA_PI | 67 | BA | Ourolândia | BA_PI | 106 | RN | Touros | NE |
| 29 | BA | Casa Nova | BA_PI | 68 | RS | Palmares do Sul | S | 107 | CE | Trairi | NE |
| 30 | RN | Ceará-Mirim | NE | 69 | PE | Paranatama | NE | 108 | BA | Tucano | NE |
| 31 | RN | Cerro Corá | NE | 70 | RN | Parazinho | NE | 109 | CE | Ubajara | NE |
| 32 | RS | Chuí | S | 71 | RN | Parelhas | NE | 110 | BA | Uibaí | BA_PI |
| 33 | RN | Currais Novos | NE | 72 | MA | Paulino Neves | NE | 111 | BA | Umburanas | BA_PI |
| 34 | PI | Curral Novo do Piauí | BA_PI | 73 | PI | Paulistana | BA_PI | 112 | BA | Urandi | BA_PI |
| 35 | BA | Dom Basílio | BA_PI | 74 | PE | Pedra | NE | 113 | BA | Várzea Nova | BA_PI |
| 36 | PI | Dom Inocêncio | BA_PI | 75 | RN | Pedra Grande | NE | 114 | PE | Venturosa | NE |
| 37 | RN | Equador | NE | 76 | RN | Pedra Preta | NE | 115 | RS | Viamão | S |
| 38 | RN | Fernando Pedroza | NE | 77 | RN | Pedro Avelino | NE | 116 | BA | Xique-Xique | BA_PI |
| 39 | CE | Fortim | NE | 78 | BA | Pindaí | BA_PI |  |  |  |  |

**Table 5** – Solar municipalities and clusters

|  | **State** | **Municipality** | **Cluster** |  | **State** | **Municipality** | **Cluster** |  | **State** | **Municipality** | **Cluster** |
| --- | --- | --- | --- | --- | --- | --- | --- | --- | --- | --- | --- |
| 1 | CE | Abaiara | NE | 17 | SP | Guaimbê | SP | 33 | PB | Pombal | NE |
| 2 | CE | Aquiraz | NE | 18 | SP | Ilha Solteira | SP | 34 | CE | Quixeré | NE |
| 3 | MG | Araxá | SP | 19 | CE | Jaguaretama | NE | 35 | PI | Ribeira do Piauí | NE |
| 4 | RN | Areia Branca | NE | 20 | MG | Jaíba | BA_MG | 36 | PI | Ribeiro Gonçalves | NE |
| 5 | MG | Arinos | BA_MG | 21 | MG | Janaúba | BA_MG | 37 | PB | Santa Luzia | NE |
| 6 | RN | Açu | NE | 22 | RN | Jandaíra | NE | 38 | RN | Santana do Matos | NE |
| 7 | BA | Barreiras | BA_MG | 23 | BA | Juazeiro | NE | 39 | MG | São Gonçalo do Abaeté | BA_MG |
| 8 | BA | Bom Jesus da Lapa | BA_MG | 24 | RN | Lajes | NE | 40 | PI | São Gonçalo do Gurguéia | BA_MG |
| 9 | PI | Brasileira | NE | 25 | CE | Limoeiro do Norte | NE | 41 | PI | São João do Piauí | NE |
| 10 | PI | Caldeirão Grande do Piauí | NE | 26 | BA | Oliveira dos Brejinhos | BA_MG | 42 | PE | São José do Belmonte | NE |
| 11 | SP | Castilho | SP | 27 | SP | Ouroeste | SP | 43 | RN | Serra do Mel | NE |
| 12 | CE | Caucaia | NE | 28 | MG | Paracatu | BA_MG | 44 | BA | Tabocas do Brejo Velho | BA_MG |
| 13 | PB | Coremas | NE | 29 | SP | Pedranópolis | SP | 45 | CE | Tabuleiro do Norte | NE |
| 14 | SP | Dracena | SP | 30 | RN | Pedro Avelino | NE | 46 | PE | Tacaratu | NE |
| 15 | PE | Flores | NE | 31 | SP | Pereira Barreto | SP | 47 | CE | Trairi | NE |
| 16 | MG | Francisco Sá | BA_MG | 32 | MG | Pirapora | BA_MG | 48 | MG | Várzea da Palma | BA_MG |

*3 – Results: Wind Ensemble*

Table 6 - 8 and Figures 1 - 3, present the wind results for each cluster, scenario, and time slice. The values correspond to the ensemble of the selected GCMs.

**Table 6a** - Wind power density change factor (*∆wPD)*  representing the relative difference between the mean *wPD* at the mid-century (2040-2069) and the historical period (1985-2014).


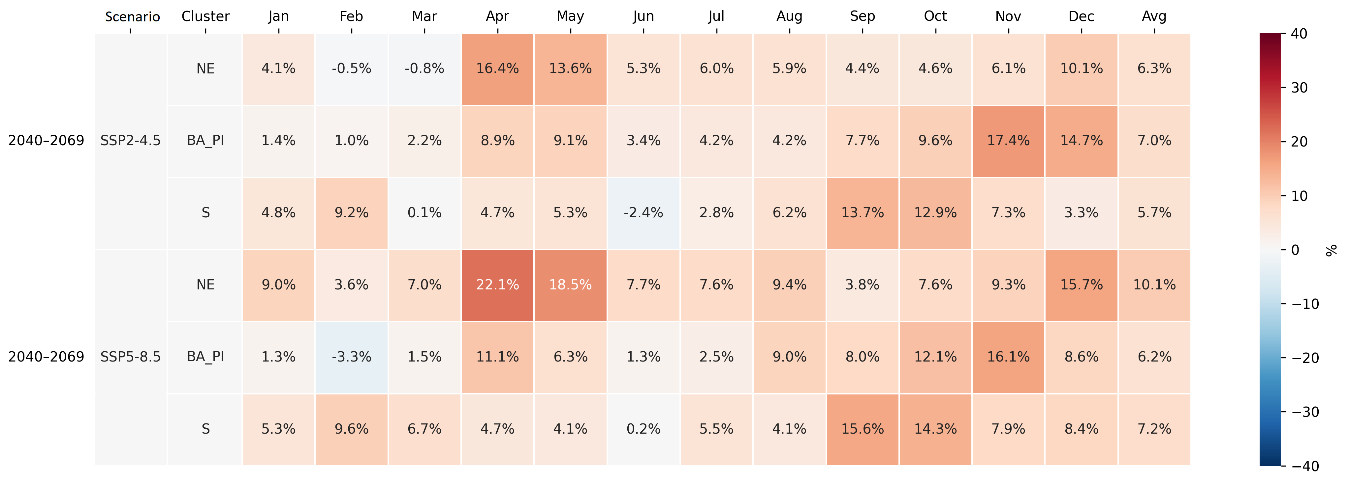


**Table 6b** - Wind power density change factor (*∆wPD)* representing the relative difference between the mean *wPD* at the end of the century (2070-2099) and the historical period (1985-2014).
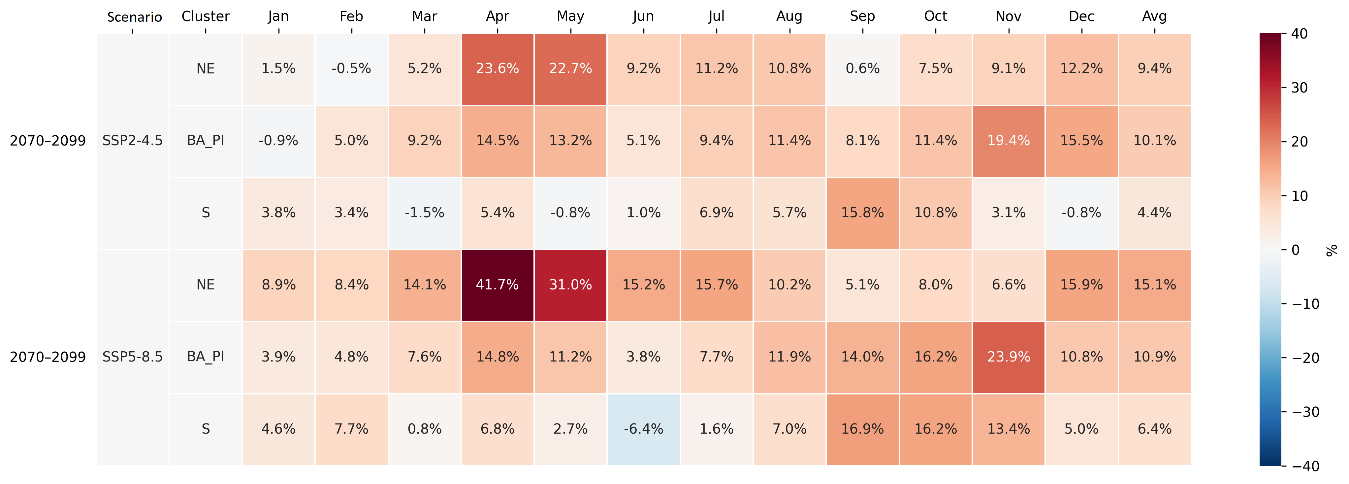


**Table 7** - Historical wind capacity factor (*hwCF*).


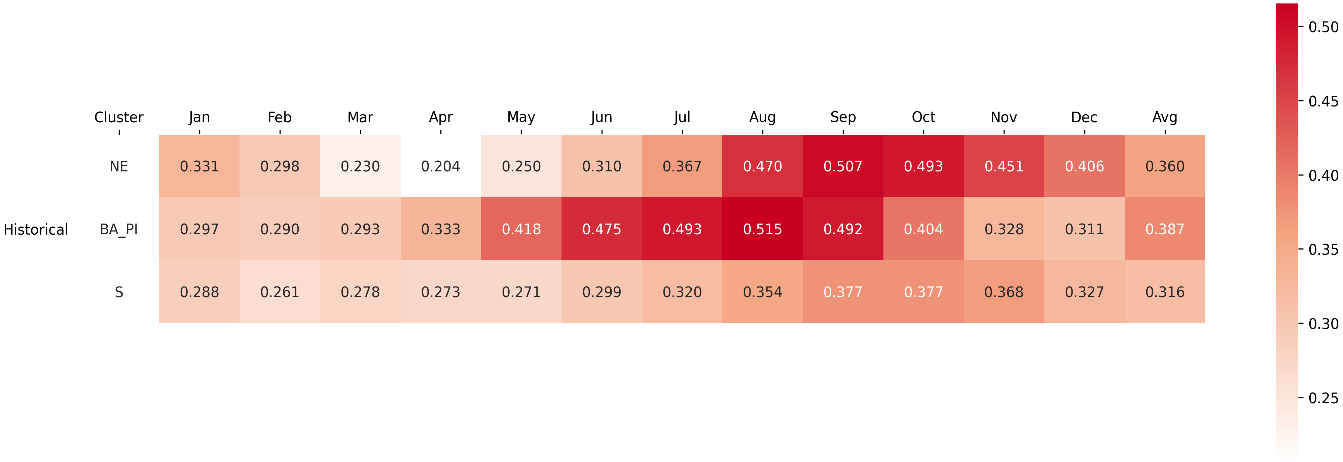


**Table 8a** - Future wind capacity factor (*fwCF*) at the mid-century (2040-2069).
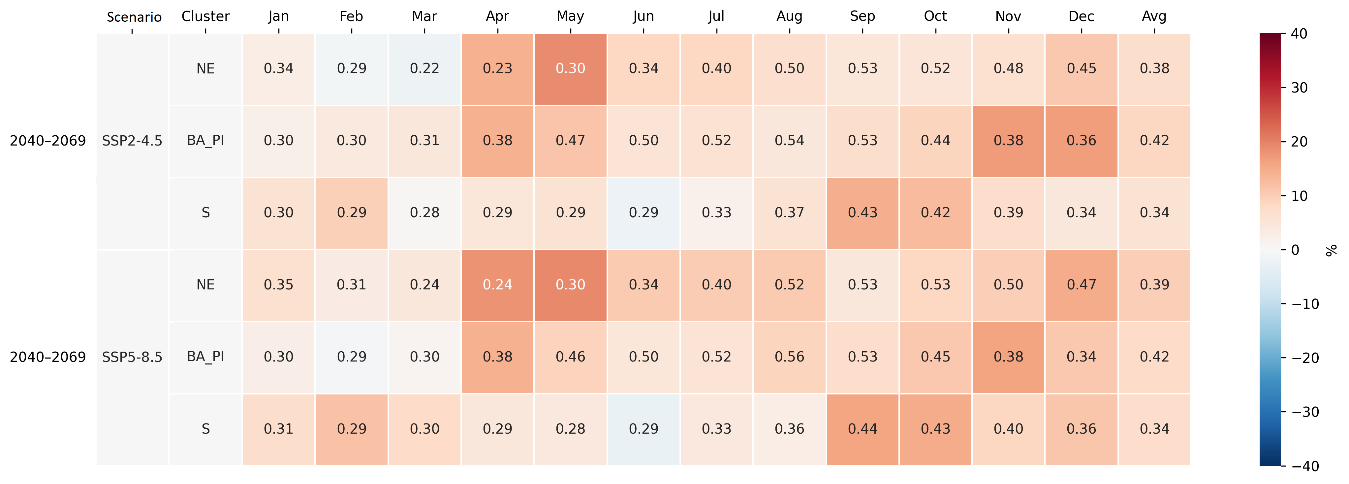
*Notes: The heatmap indicates variations in fwCF in comparison with hwCF.*

**Table 8b** - Future wind capacity factor (*fwCF*) at the end of the century (2070-2099).
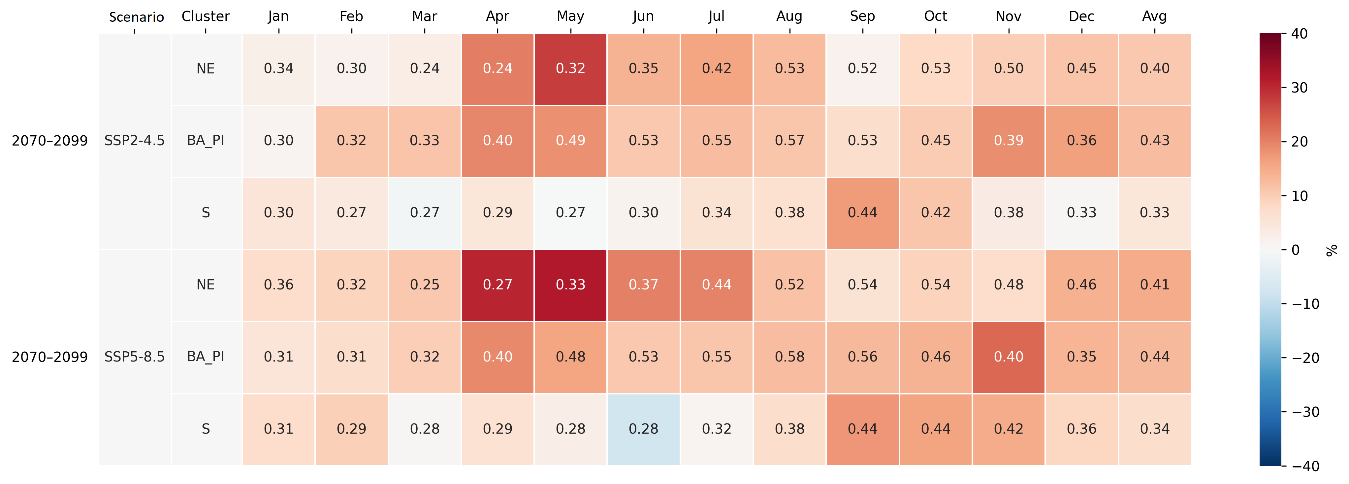
*Notes: The heatmap indicates variations in fwCF in comparison with hwCF.*


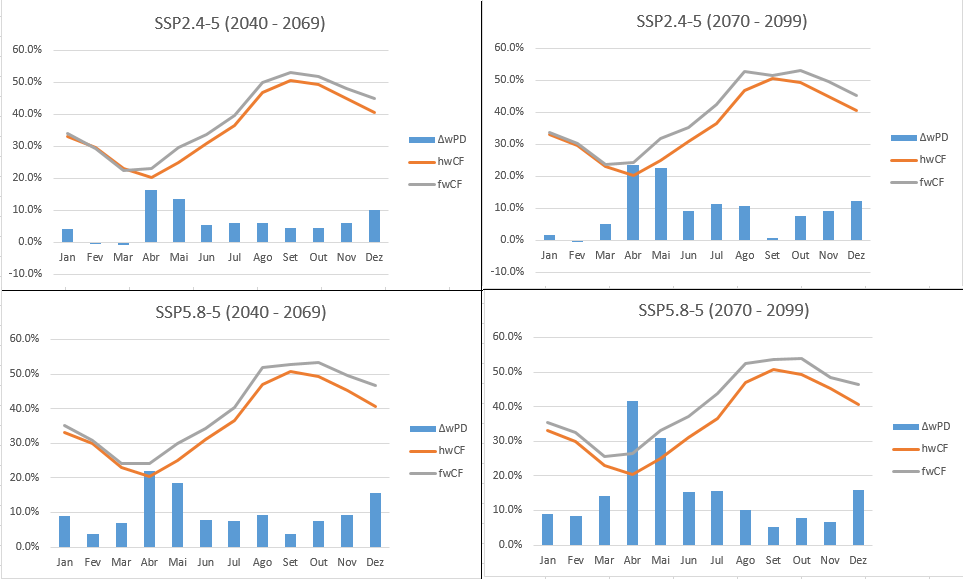
**Figure 1** - *Cluster NE* monthly future wind capacity factor (*fwCF*), historical wind capacity factor *(hwCF*) and wind power density change factor *(∆wPD)*


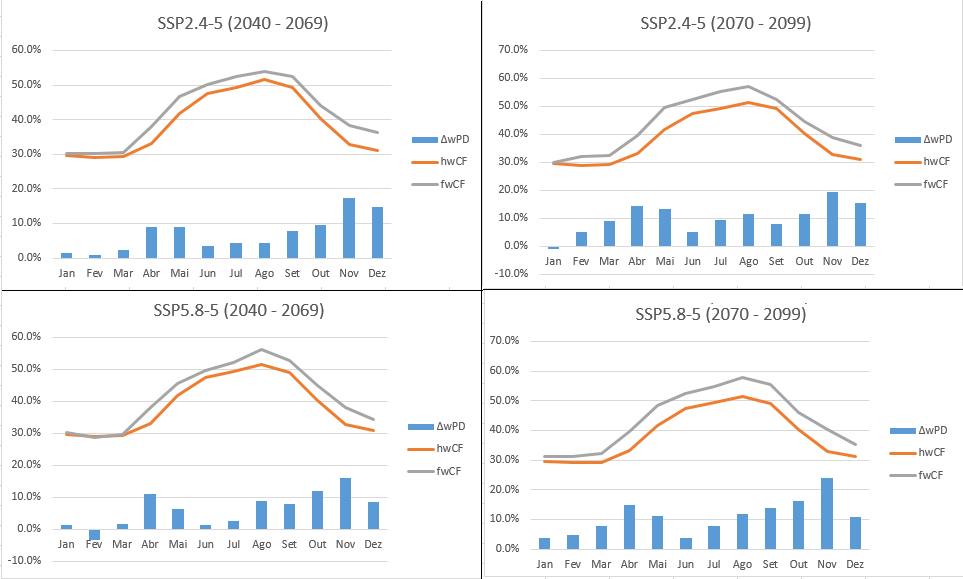


**Figure 2** - *Cluster BA_PI* monthly future wind capacity factor (*fwCF*), historical wind capacity factor (hwCF) and wind power density change factor *(∆wPD)*


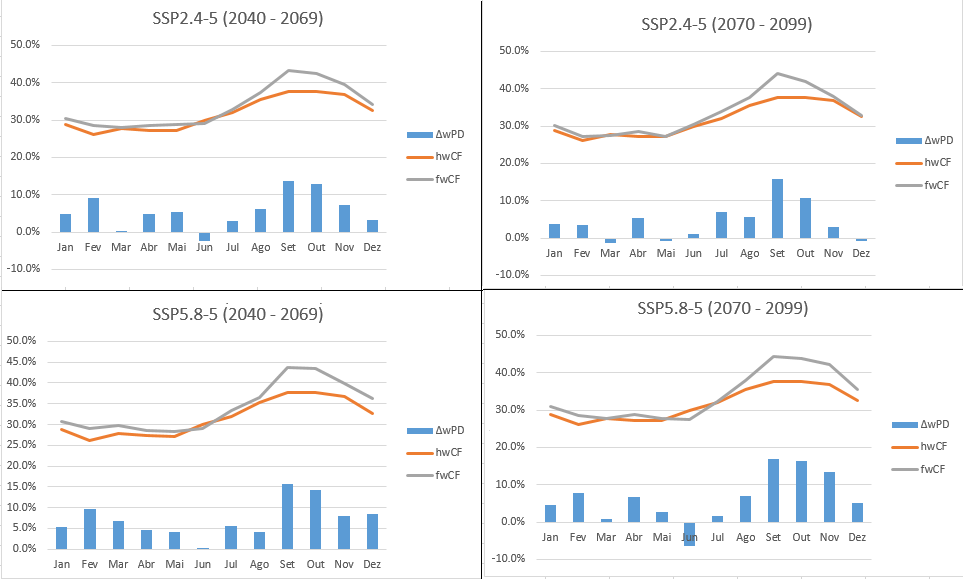


**Figure 3** - *Cluster S* monthly future wind capacity factor (*fwCF*), historical wind capacity factor (hwCF) and wind power density change factor *(∆wPD)*

*3.2 – Results: Wind by GCM*

Tables 3 - 5 and Figure 4 display the *fwCF* for each cluster, displaying all GCMs utilized in the analysis. In addition to the monthly values, the tables also report the corresponding monthly means and standard deviations.

**Table 3** - *Cluster NE* future wind capacity factor (*fwCF*)

**Table 4 -** *Cluster BA_PI* future wind capacity factor (*fwCF*)

**Table 5** - *Cluster S* future wind capacity factor (*fwCF*)

Figure 4 displays the *fwCF* annual mean variability among GCM using boxplots for each cluster, scenario and time-slice.


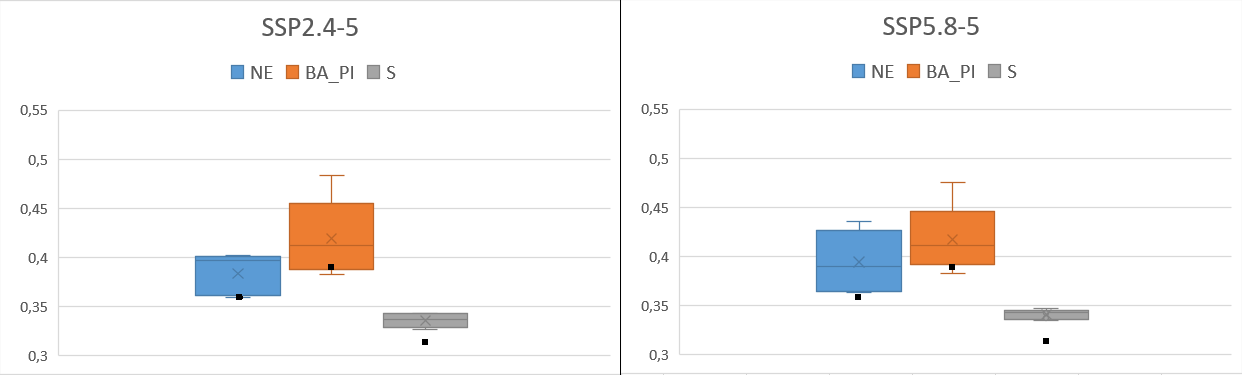


**Figure 4a** – *fwCF* annual mean variability by clusters between the GCMs in the mid- century for SSP2-4.5 and SSP5-8.5. Black dots represent *hwCF*.


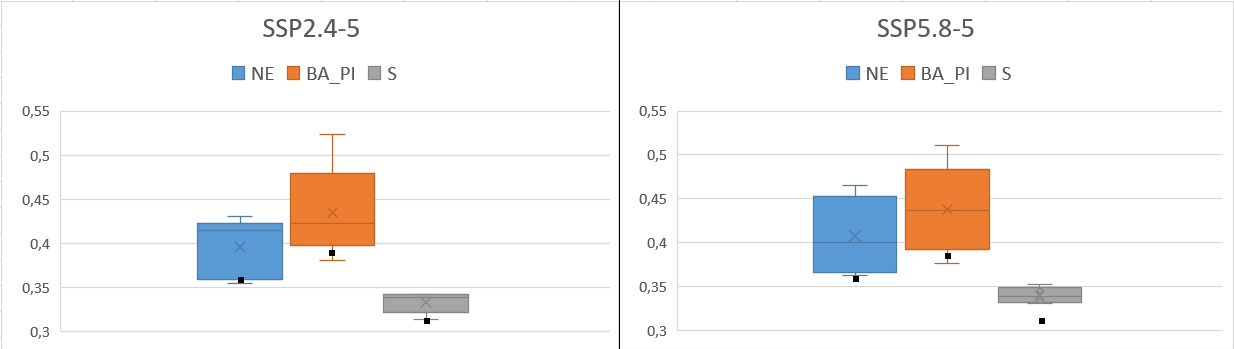


**Figure 4b** – *fwCF* annual mean variability by cluster between the GCMs at the end of the century for SSP2-4.5 and SSP5-8.5. Black dots represent *hwCF*.

*3 – Results: Solar PV Ensemble*

Table 9 - 12 and Figures 5 - 7, present the solar PV results for each cluster, scenario, and time slice. The values correspond to the ensemble of the selected GCMs

**Table 9a** - Surface solar irradiance change factor (*∆sR*) representing the relative difference between the mean *sR* at the mid-century (2040-2069) and the historical period (1985-2014).

*
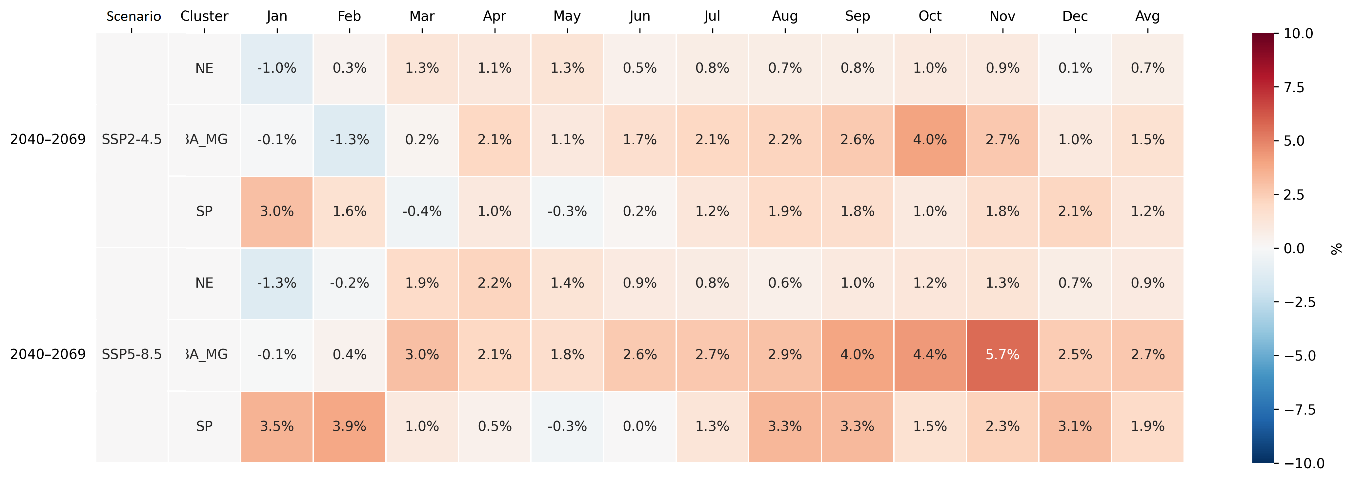
*

**Table 9b** - Surface solar irradiance change factor (*∆sR*) representing the relative difference between the mean *sR* at the end of the century (2070-2099) and the historical period (1985-2014).

*
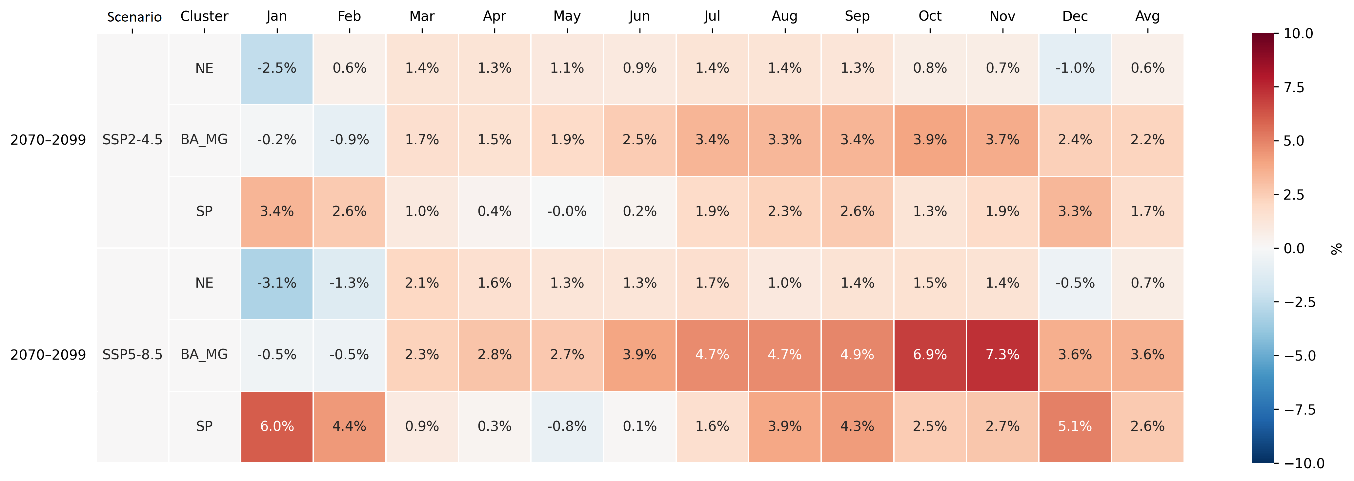
*

**Table 10a** - Solar panel efficiency change factor (*∆ sPE*) representing the relative difference between the mean *sPE* at the mid-century (2040-2069) and the historical period (1985-2014).


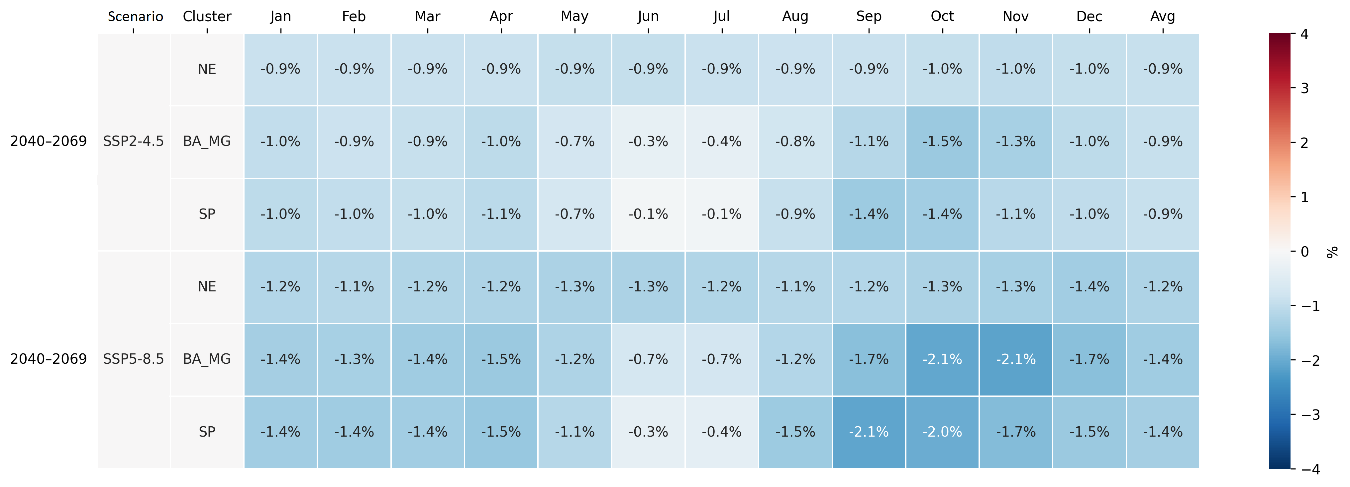


**Table 10b** - Solar panel efficiency change factor (*∆ sPE*) representing the relative difference between the mean *sPE* at the end of the century (2070-2099) and the historical period (1985-2014).
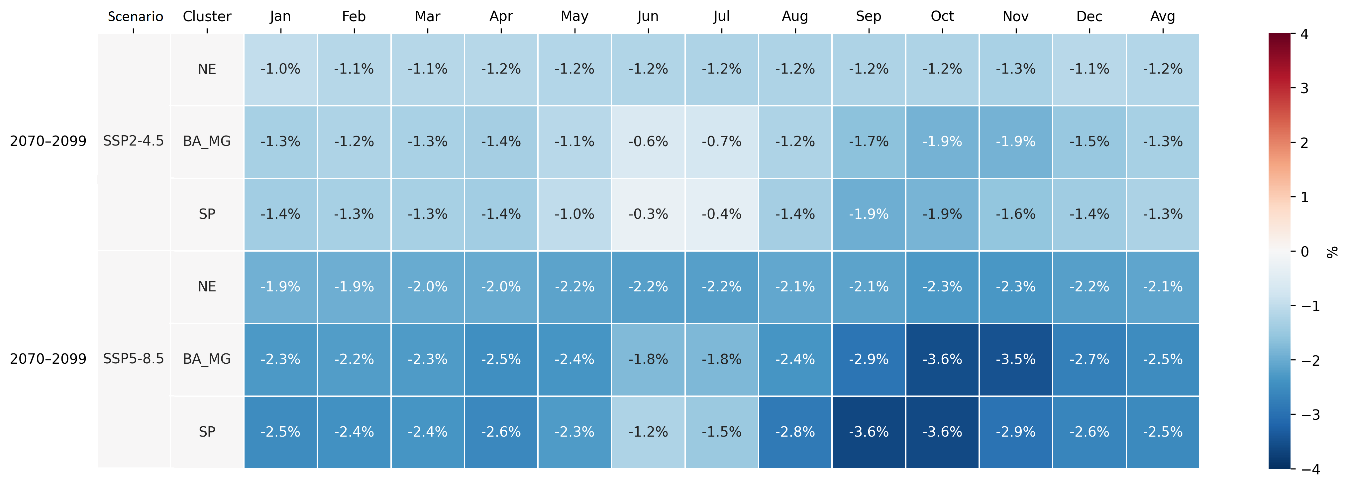


**Table 11 -** Historical solar capacity factor (*hsCF*).
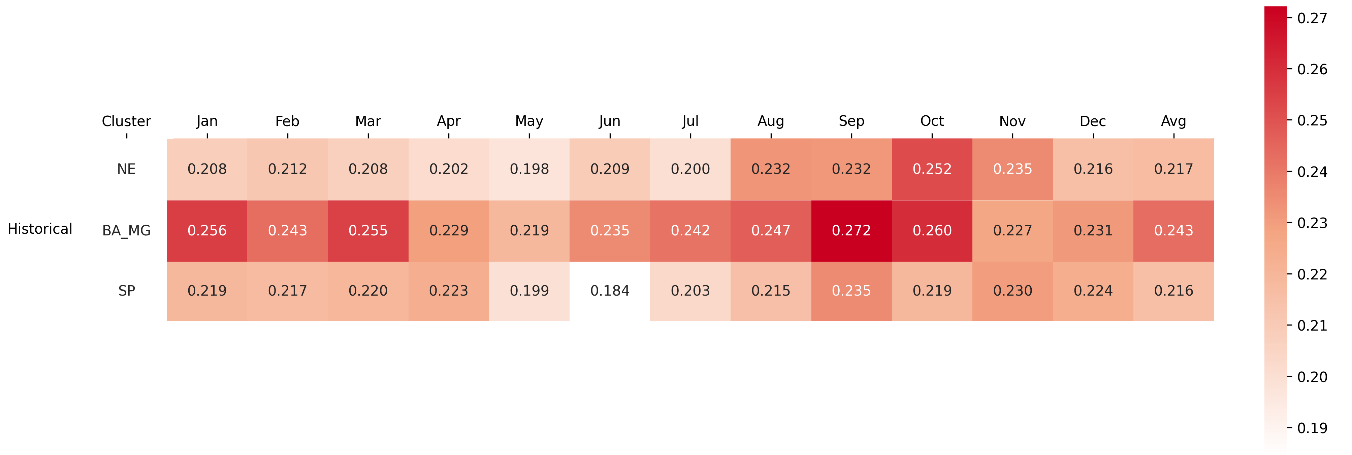

**Table 12a -** Future solar capacity factor (*fsCF*) at the mid-century (2040-2069).


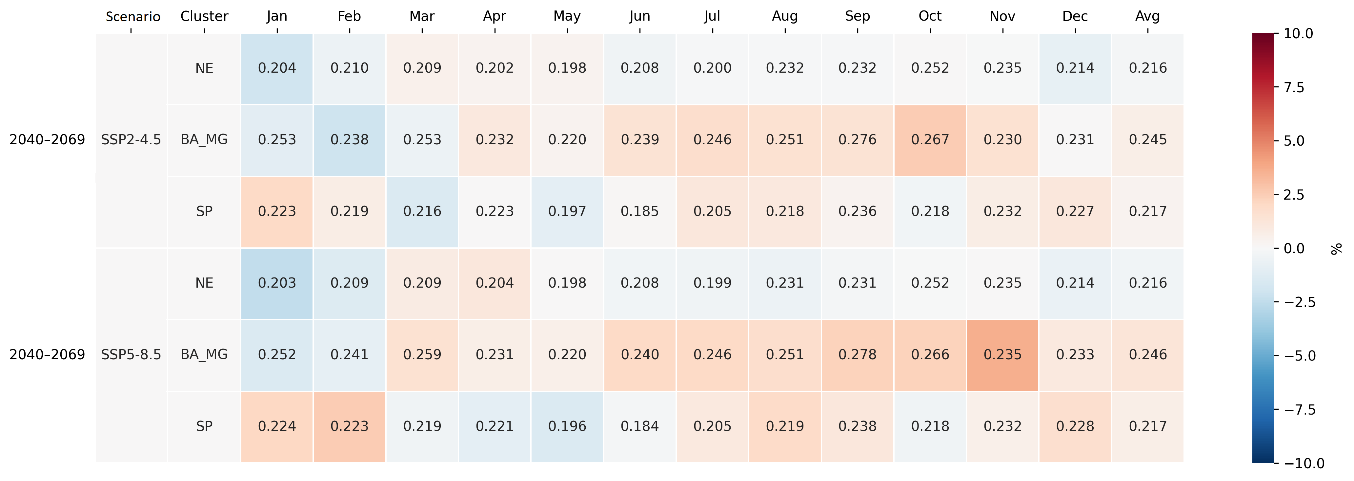


*Notes: The heatmap indicates variations in fsCF in comparison with hsCF.*

**Table 12b** - Future solar capacity factor (*fsCF*) at the end of the century (2070-2099).
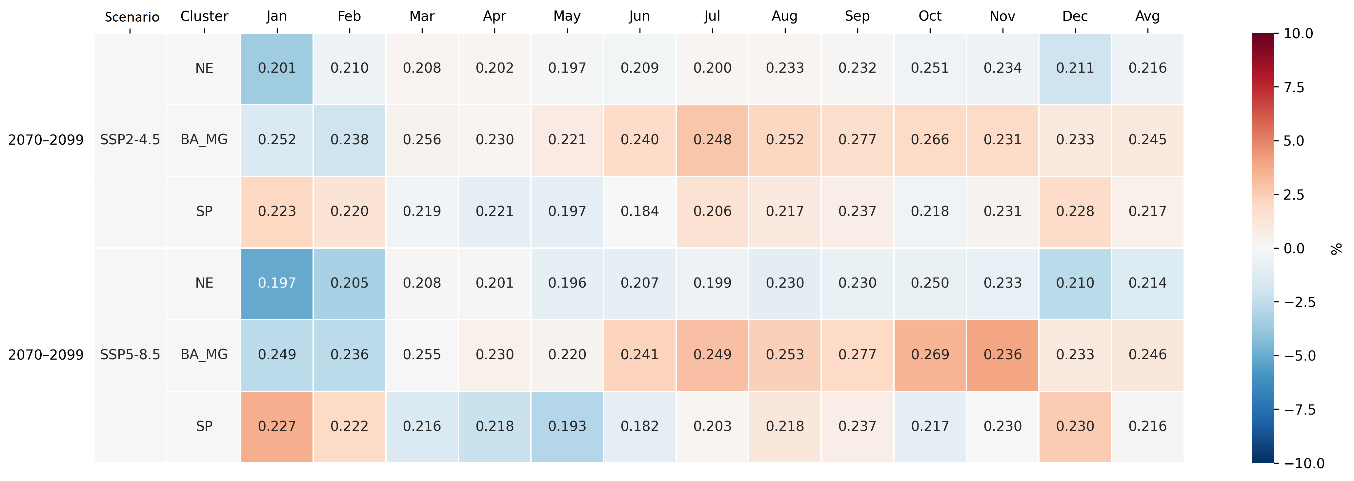
*Notes: The heatmap indicates variations in fsCF in comparison with hsCF.*


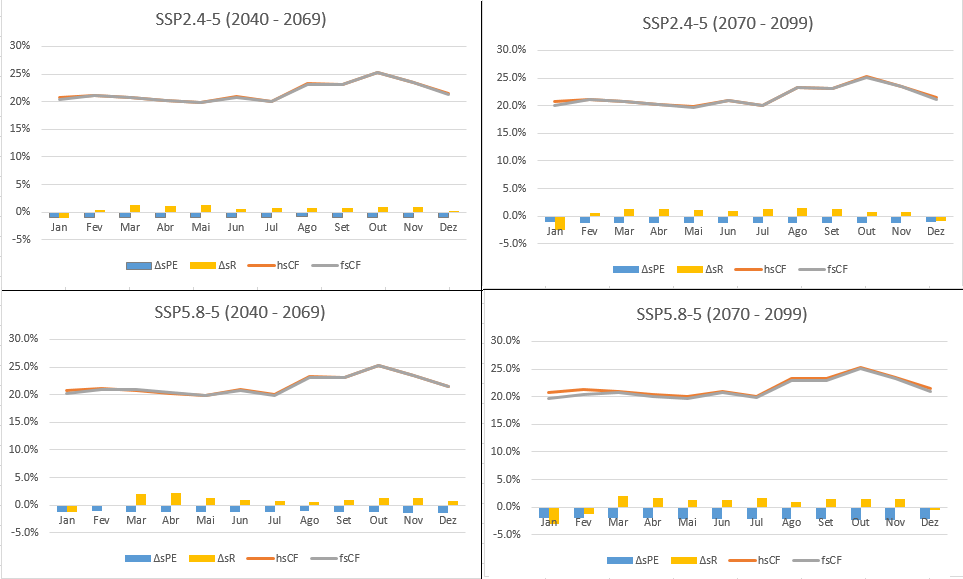


**Figure 5** - *Cluste*r NE monthly future solar capacity factor (*fsCF*), historical solar capacity factor (*hsCF*), solar radiation change factor *(∆sR)* and solar PV panel efficiency change factor (*∆SPE)*
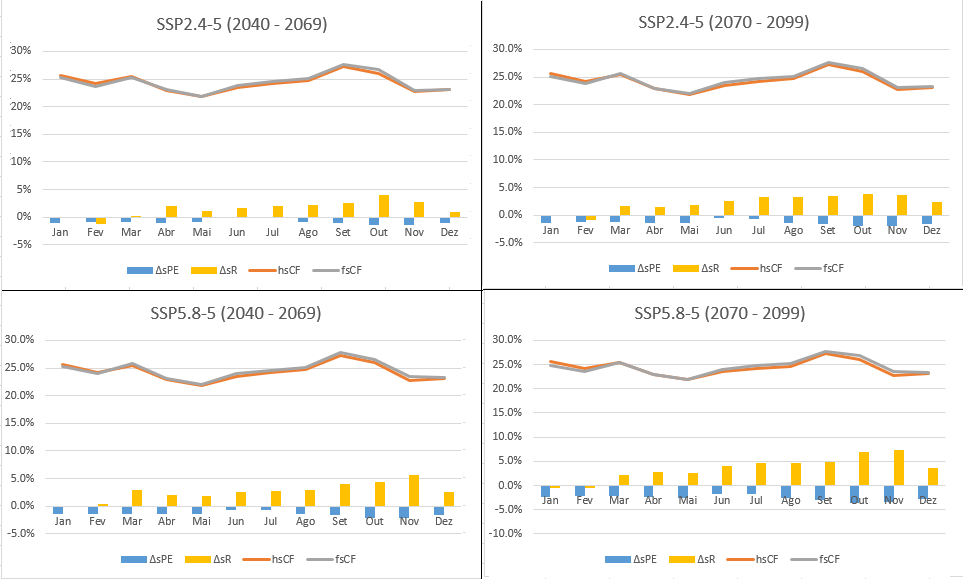


**Figure 6** - *Cluster BA_MG* monthly future solar capacity factor (*fsCF*), historical solar capacity factor (*hsCF*), solar radiation change factor *(∆sR)* and solar PV panel efficiency change factor (*∆SPE)*


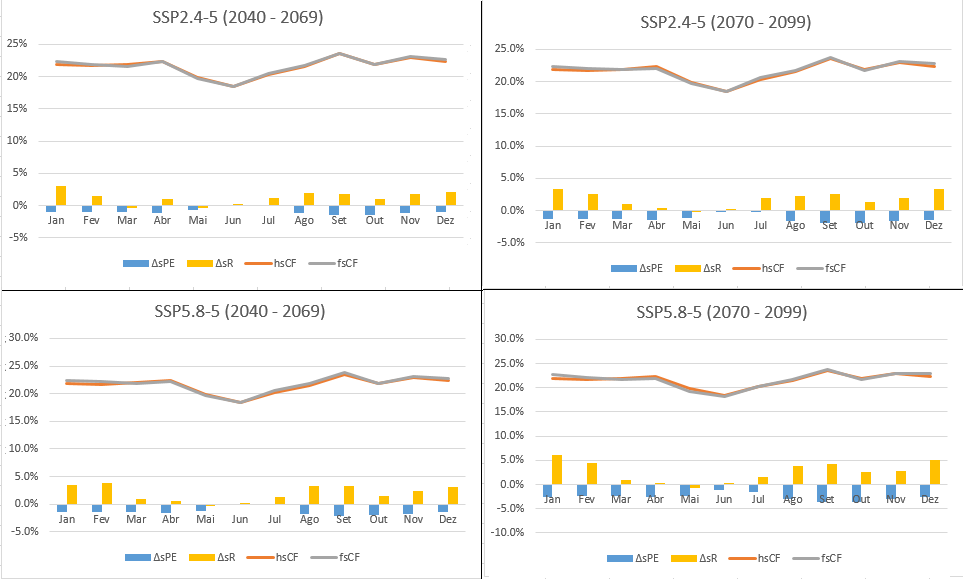


**Figure 7** - *Cluster SP* monthly future solar capacity factor (*fsCF*), historical solar capacity factor (*hsCF*), solar radiation change factor *(∆sR)* and solar PV panel efficiency change factor (*∆SPE)*

*3 - Future solar PV capacity factor variability by GCM*

Tables 6, 7, and 8 display the *fsCF* for each cluster, displaying all GCMs utilized in the analysis. In addition to the monthly values, the tables also report the corresponding monthly means and standard deviations.

**Table 6** - *Cluster NE* future solar capacity factor (*fsCF*)

**Table 7** - *Cluster BA_MG* future solar capacity factor (*fsCF*)

**Table 8** - *Cluster SP* future solar capacity factor (*fsCF*)

Figure 8 displays the *fsCF* annual mean variability among GCM using boxplots for each cluster, scenario and time-slice.


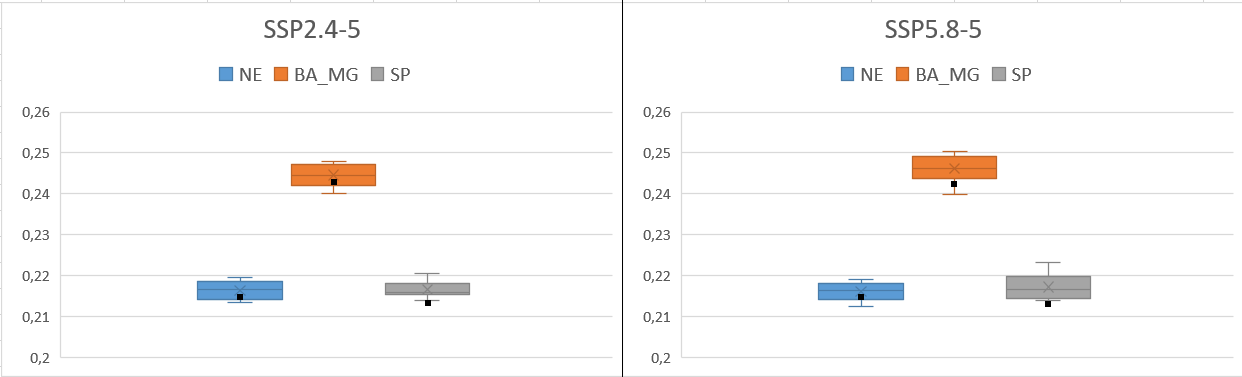
**Figure 8a** – *fsCF* annual mean variability by cluster between the GCMs in the mid-century for SSP2-4.5 and SSP5-8.5. Black dots represent *hsCF*.


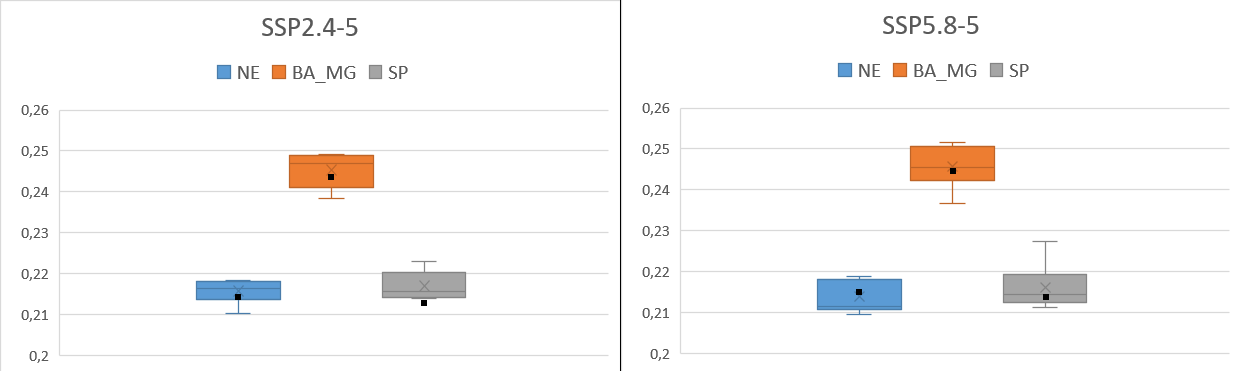


**Figure 8b** – *fsCF* annual mean variability by cluster between the GCMs at the end of the century for SSP2-4.5 and SSP5-8.5. Black dots represent *hsCF*.
